# Supplementary material
Source: PubMed Central journal article supplement (PMC3593753)
Supplement: NIHMS429480-supplement-Supp_Figure_01-04.pdf [file NIHMS429480-supplement-Supp_Figure_01-04.pdf]

**Figure S1:**

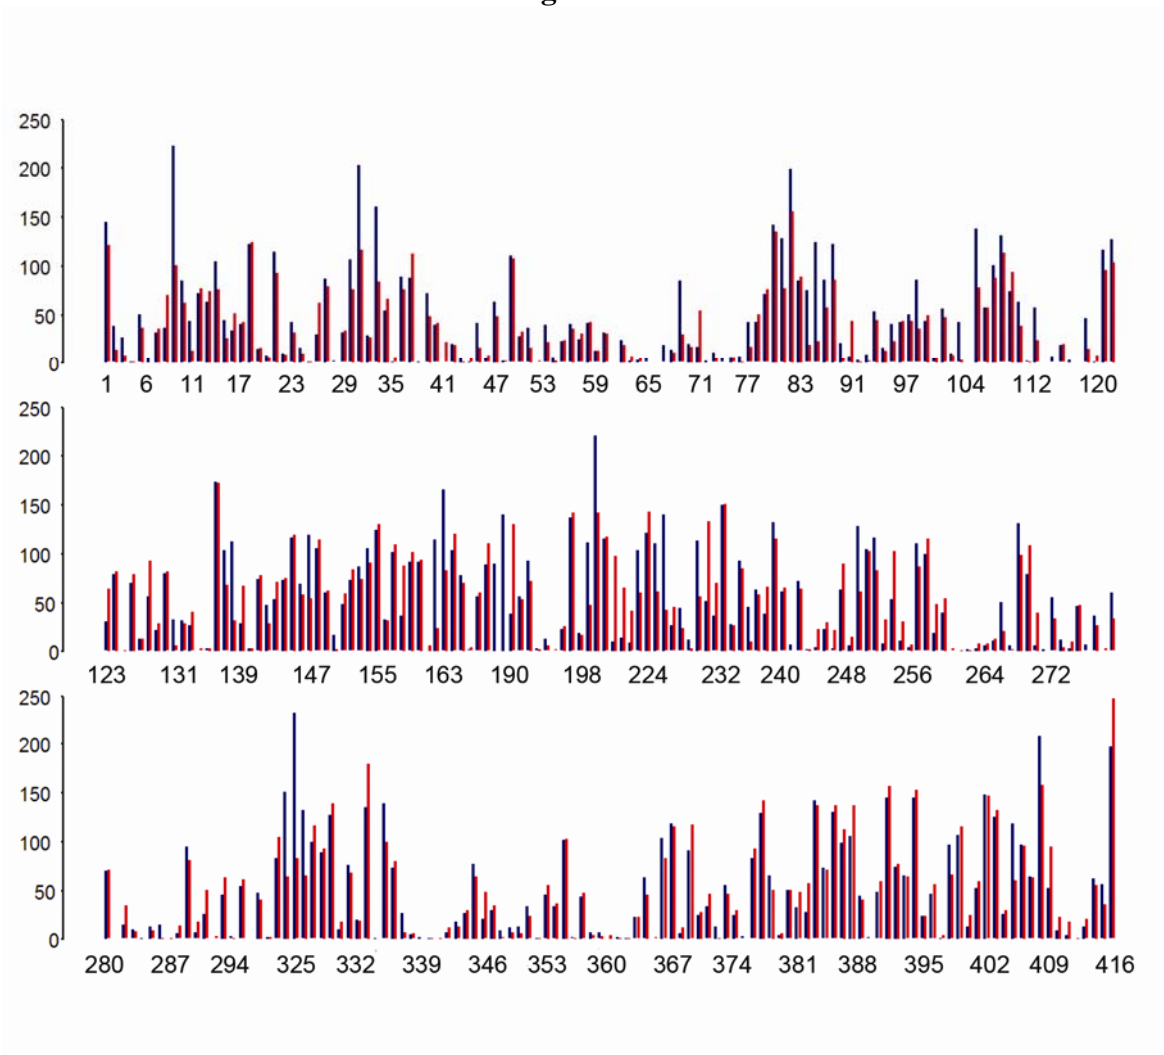

**Fig. S1:** Solvent accessible areas of individual residues in Å<sup>2</sup> for the 3D model (in blue) and the X-ray crystal structure (3S7E) (in red) of Ara h 1. Residue numbers follow the numbering of residues in the model co-ordinate set.

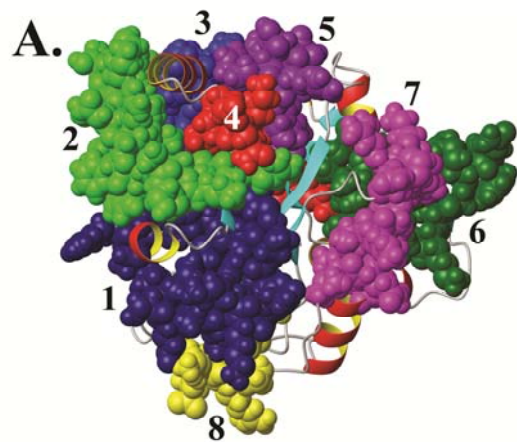

**SDAP Model 802**

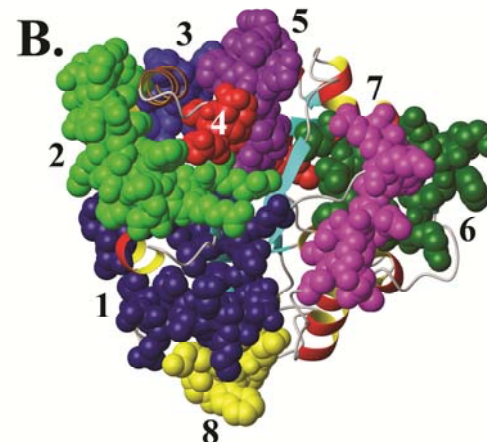

**Hev b 2 Experimental Structure 3EM5**

**Figure S2.** Comparison of the structural regions of Hev b 2 that correspond to the linear peptides that bind IgE antibodies. A) 3D model and B) X-ray crystal structure of Hev b 2.

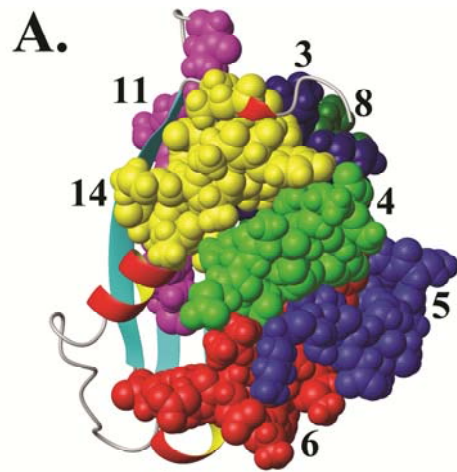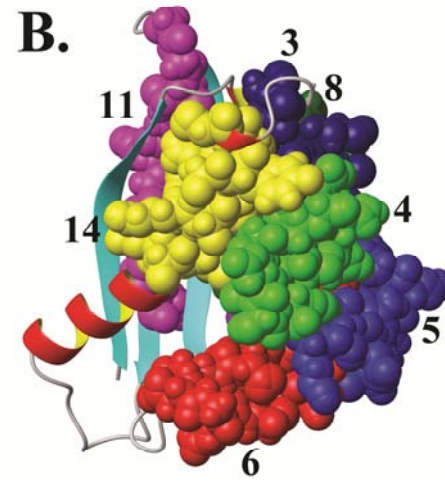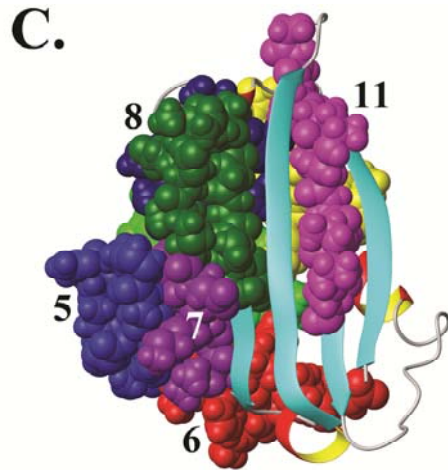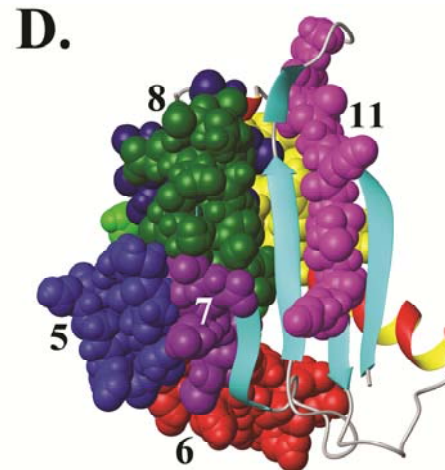

**SDAP Model 371**

**Gly m 4 Experimental Structure 2K7H**

**Figure S3.** Comparison of the structural regions of Gly m 4 that correspond to the linear peptides that bind IgE antibodies. Two views are shown for the 3D model (A and C) and the X-ray crystal structure (B and D) of Gly m 4.

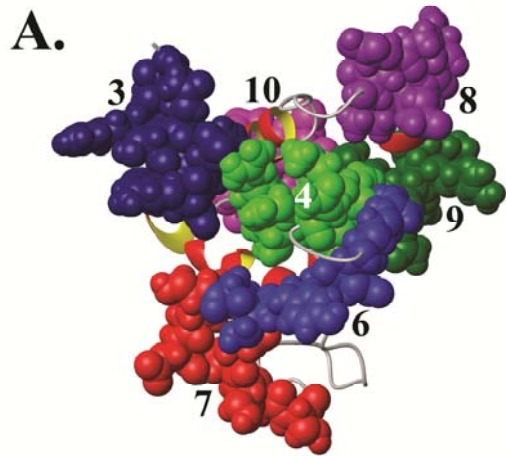

**SDAP Model 283**

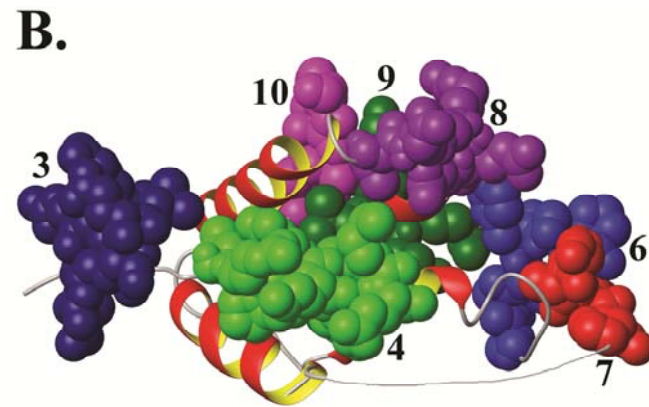

**Ara h 2 Experimental Structure 3OB4**

**Figure S4.** Comparison of the structural regions of Ara h 2 that correspond to the linear peptides that bind IgE antibodies. Epitopes 3, 4, 6-10, listed in the Ara h 2 entry page of SDAP (<http://fermi.utmb.edu/SDAP/>), were mapped on the 3D model (A) and X-ray crystal structure (B) of Ara h 2.
