# Supplementary material
Source: PubMed Central journal article supplement (PMC3593753)
Supplement: NIHMS429480-supplement-Supp_Table_01.pdf [file NIHMS429480-supplement-Supp_Table_01.pdf]

**Table S1: Comparison of 3D models with Quality Measures (Post-prediction analysis)**

| Allergen Name | Protein                                                 | Sequence Identity to template (%) | Structural RMSD (Å) | Coverage (%)                       | QMEAN <sup>#</sup> Score (QMEAN Z-score) | ProSA <sup>%</sup> (Z-score) | Verify_3D <sup>&amp;</sup> Average Score > 0.2 (%) |
|---------------|---------------------------------------------------------|-----------------------------------|---------------------|------------------------------------|------------------------------------------|------------------------------|----------------------------------------------------|
| Hev b 2       | rubber (latex), 1,3-glucanase                           | 45.9                              | 1.3<br>1.2*         | 95.5 (300/314)<br>98.4 (309/314)*  | 0.777 (0.03)                             | -8.60                        | 99.68<br>(Pass)                                    |
| Gly m 4       | soybean, stress-induced protein SAM22                   | 44.9                              | 2.3<br>2.7*         | 98.1 (153/156)<br>100.0 (156/156)* | 0.739 (-0.15)                            | -7.13                        | 100<br>(Pass)                                      |
| Sol i 3       | fire ant, venom allergen III                            | 42.8                              | 1.5<br>1.7*         | 92.6 (199/215)<br>96.3 (207/215)*  | 0.652 (-1.25)                            | -5.61                        | 66.98<br>(Warning)                                 |
| Ara h 1       | peanut, vicilin                                         | 38.7                              | 1.5<br>1.6*         | 79.8 (332/416)<br>83.9 (349/416)*  | 0.695 (-0.91)                            | -5.93                        | 88.42<br>(Pass)                                    |
| Dau c 1       | carrot, pathogenesis-related protein, PR-10             | 37.9                              | 1.3<br>1.3*         | 95.4 (146/153)<br>99.3 (152/153)*  | 0.725 (-0.27)                            | -7.00                        | 85.06<br>(Pass)                                    |
| Der f 1.0106  | American house dust mite, cysteine protease             | 31.6                              | 1.9<br>1.9*         | 90.1 (191/212)<br>99.1 (210/212)*  | 0.686 (-0.89)                            | -6.25                        | 67.61<br>(Warning)                                 |
| Can f 2       | salivary canine allergen, lipocalin                     | 26.8                              | 1.5<br>1.6*         | 89.8 (141/157)<br>94.3 (148/157)*  | 0.633 (-1.28)                            | -4.30                        | 94.30<br>(Pass)                                    |
| Ara h 2       | peanut, conglutin                                       | 22.4                              | 3.1<br>2.2*         | 41.0 (55/134)<br>63.4 (85/134)*    | 0.452 (-3.15)                            | -4.00                        | 66.14<br>(Warning)                                 |
| Bla g 4       | German cockroach, calycin                               | 15.4                              | 3.0<br>3.0*         | 35.2 (64/182)<br>77.0 (141/182)*   | 0.307 (-4.68)                            | -2.67                        | 55.93<br>(Fail)                                    |
| Aed a 2       | mosquito, salivary, odorant binding protein, protein D7 | 9.8                               | 3.2<br>2.5*         | 53.7 (66/123)<br>94.0 (116/123)*   | 0.415 (-3.55)                            | -5.63                        | 38.71<br>(Fail)                                    |
|               |                                                         | 11.3                              | 3.2<br>2.9*         | 65.3 (81/124)<br>94.0 (116/124)*   | 0.416 (-3.50)                            | -4.03                        | 58.40<br>(Fail)                                    |

# QMEAN scores were calculated by the QMEAN web server (<http://swissmodel.expasy.org/qmean/cgi/index.cgi>). High quality 3D models have typically QMEAN Z-scores between -1.0 and 0.5 (mean Z-score = -.65). A lower Z-score is observed for medium quality models (mean Z-score = -1.75), and low quality models have typically Z-scores below -3.0.

% The ProSA Z-scores were calculated through the ProSA web server (<https://prosa.services.came.sbg.ac.at/prosa.php>). The Z-score measures the deviation of a knowledge-based energy value of a model relative to the energy distribution derived from random conformations of proteins. The Z-score of a model has to be compared to the Z-scores of experimental determined X-ray and NMR structures which are size dependent in the assessment of model quality.

& The 3D-1D scores from Verify\_3D were calculated through the web server at the NIH MBI Laboratory for Structural Genomics and Proteomics at UCLA ( <http://nihserver.mbi.ucla.edu/SAVES/>). The score measures the compatibility of a 3D protein structure with its sequence by using the statistical preferences of each of the twenty amino acids with the structural environment. We used as a quantitative measure for global model quality the percentage of amino acids in the models with a score greater than 0.2. In general, native like structures tend to have very high ratios near 100%, and 3D models of low quality tend to have low ratios (<60%). The classification of the models in pass, warning and fail is taken from the output of the Verify\_3D web server.
